# Supplementary material for: A Simple and Accurate Method Based on a Water-Consumption Model for Phenotyping Soybean Genotypes under Hydric Deficit Conditions
Source: MDPI journal article supplement (doi:10.3390/agronomy12030575), 2022-02-25
Supplement: s1 [file s1]

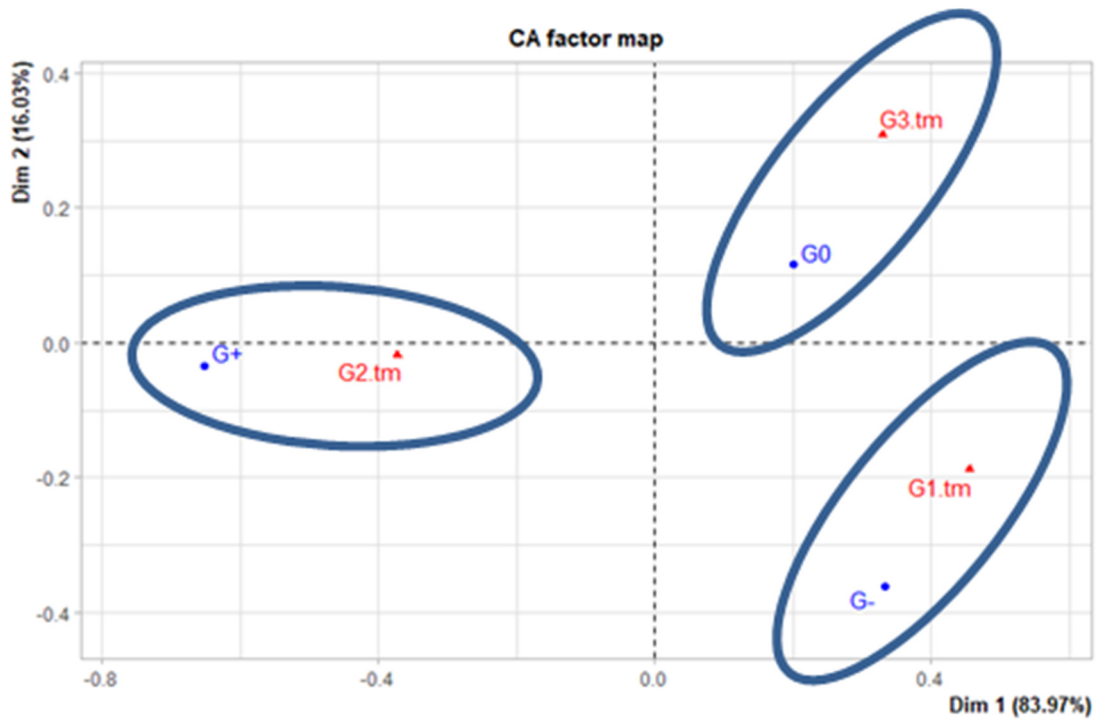

**Figure S3.** Cluster analysis based on drought susceptibility index (DSI) and the parameter of the model  $t_{0.5}$ . The DSI was calculated based on the yield variation between field trials with irrigation and in rainfed in two contrasting years with respect to the rainfall index. G+: genotypes that have an interannual increase in DSI. G-: genotypes that have an interannual decrease in DSI. G0: genotypes without variations in the DSI between the years. G1: genotypes with low  $t_{0.5}$ . G2: genotypes with intermediate  $t_{0.5}$ . G3: genotypes with high  $t_{0.5}$ . For more details of G+ G- and G0 see Quero et al. (2021) [31].
