# Supplementary material for: A Simple and Accurate Method Based on a Water-Consumption Model for Phenotyping Soybean Genotypes under Hydric Deficit Conditions
Source: MDPI journal article supplement (doi:10.3390/agronomy12030575), 2022-02-25
Supplement: s1 [file s1]

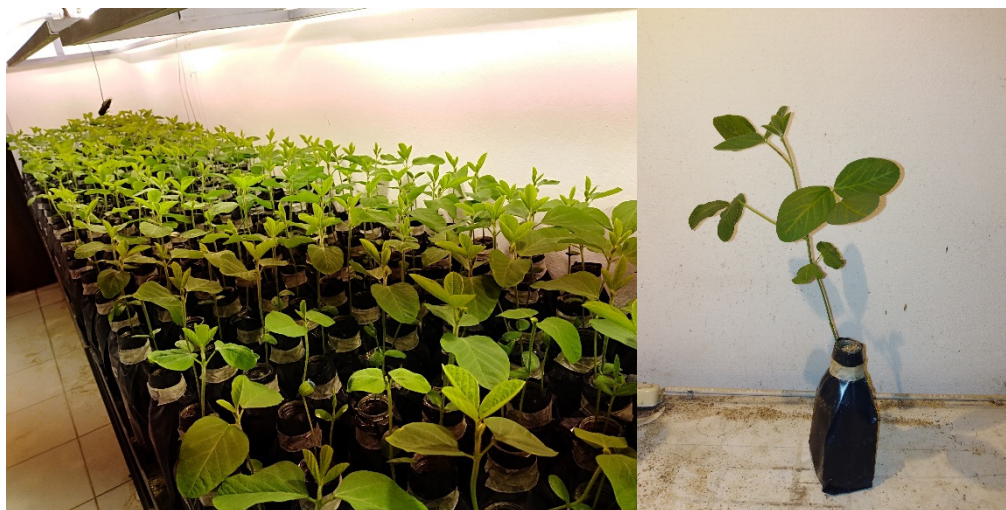

**Figure S1.** Experimental setup and plant growth system, consistent in a 0.5 L plastic bottle (pot) filled with a mix of sand:vermiculite (1:1). This combination of plant, pot, and substrate was defined as a Plant Pot Substrate system (PPS).
