# Supplementary material for: A Simple and Accurate Method Based on a Water-Consumption Model for Phenotyping Soybean Genotypes under Hydric Deficit Conditions
Source: MDPI journal article supplement (doi:10.3390/agronomy12030575), 2022-02-25
Supplement: s1 [file s1]

$$\begin{aligned}
\frac{dA_{ET}(t)}{dt} &= -kA_{ET}(t) \\
\frac{1}{A_{ET}(t)} \frac{dA_{ET}(t)}{dt} &= -k \\
\frac{d}{dt}(\ln(A_{ET}(t))) &= -k \\
\ln(A_{ET}(t)) &= \int -k dt = -kt + C \quad (\text{where } C \text{ is an arbitrary constant}) \\
A_{ET}(t) &= e^{-kt+C} = e^{-kt} \underbrace{e^C}_B \\
A_{ET}(t) &= Be^{-kt}
\end{aligned}$$

**Figure S2.** Solution of the first-order linear homogeneous differential Equation (3) using the separation of variables method
